# Supplementary material
Source: PubMed Central journal article supplement (PMC4215259)
Supplement: supp_M114.572453_jbc.M114.572453-1.pdf [file supp_M114.572453_jbc.M114.572453-1.pdf]

**Figure S1. Comparison of ARM motif residues in Drosophila UNC-45 and TgUNC**

```

          10      20      30      40
DmUNC  MTNTINSEEVSDAGSYKDKGNEAFKASRWEEAVEHYGKAIKAGSK-----
      . .  .: . .  . : . . . . : : . . . . : : . . . . . :
TgUNC  MEDLSNAM-LARLQALKEEGNAEFKRGKFESAIEAYSRCLEDDASDTLDKEPDVLLGGACAA
          10      20      30      40      50

          50      60      70      80
DmUNC  -----HKELAVFYK-----NRAAAYLKLKGYENAVEDCTESLKAAPG
      . . . . . : : . . . . : : . . . . : : . . . . . :
TgUNC  SLSSSDSQVAEPRKESPAILKRVAELKAQILCNRALCYQRTKQFAAAEADCTRAIALHPA
      60      70      80      90      100     110

          90      100     110     120     130     140
DmUNC  DPKALFRRAQAYEALEKFEEAYKDATAALFKADPGNKTVPMLQ--RLHVVEERSARNAK
      . . . . . : : . . . . : . . . . . : : . . . . : : . . . . . :
TgUNC  YVKSYYRRAVALDAQRRKECVEDLQTCRLRLQPGNKEAQEMLAGVRDKVMKEEETRVVEEQ
      120     130     140     150     160     170

          150     160     170     180     190     200
DmUNC  TSTKVKQMMDLTFDLATPIDKRRAAANLVLVLAKEQTGAELLYKDHCIKVASLTKVEKD
      . . . . . . . . . . : : . . . . . . . . . . : : . . . . . :
TgUNC  LP---ENLLTAGLNDVLTASKRVAASLRQLGAFVQERKLRRQFLRDGGLRRVAVALKSQMD
      180     190     200     210     220     230

          210     220     230     240
DmUNC  QDIYVN-MVHL-VAALCENS-----ERTKG---VLTELGVV---W---FMRVLDQKHEN
      . . . . . : : . . . . : . . . . . : . . . . . : . . . . . :
TgUNC  SELEGNGQPHRSLSLPETTASDPVASEESKSSADAVLPVSVVEAACWELLLSVVOHQHAD
      240     250     260     270     280     290

          250     260     270
DmUNC  CVSTAQFCLQT-----ILN---ALSGLNKPKD-----SKPDKE
      . . . . . : : . . . . : . . . . . : . . . . . : . . . . . :
TgUNC  DEDDANKALQTSVEAVNAPLQVDAPVLECRQALSGLWTPNDFLVRRLQLLRAGVARSDGL
      300     310     320     330     340     350

          280     290     300     310
DmUNC  LCTRNNREI-----DTLLT---CLVYSIT-----DRTISGAARDGVIELITRN
      : . . . . : : . . . . : . . . . . : . . . . . : . . . . . :
TgUNC  AATAANEEAGKLRTVWRGEACDRLLRTMGCVVQLQAAQFDEDASFLEACAAGLECIDRSRE
      360     370     380     390     400     410

          320     330     340     350
DmUNC  VHYTAL-----EWAERL-----VEIR-GLCRLI-DVCELEDYKYESAMDITGSSST
      . . . . . . . . . . : : . . . . : . . . . . : . . . . . :
TgUNC  VQRAAVAALVGVADARRRLGGRVAAVRLRHGLEKCLEDALQVVSDAEHELAGEDARSQLA
      420     430     440     450     460     470

          360     370     380     390
DmUNC  IASV-----CLARIYENMY-----DEAKARFTDQIDEYIKDKLLAPDM-----
      : . . . . : . . . . . : . . . . . : . . . . . :
TgUNC  TASKKSDRLEAVSRLQGTQTEYLIITLIALLADKDRGKEEPPDMSRLVDQLLSPYFRPCAD
      480     490     500     510     520     530

```

```

400      410      420      430
DmUNC  --ESKVRVTVAITAL---LNGPLDVGNQ-VVAREGILQMILAMA-----TTD
      : : : : : : : : : : : : : : : : : : : : : : : : : : : : : :
TgUNC  PEESVVTTLTVGLKALRLILTAAREVARAYLISASSILPYLLAAAAGGVGTAQSGAAGTAA
      540      550      560      570      580      590

440      450      460      470      480      490
DmUNC  DELQQRVACECLIAASSKKD-KAKALCEQGVDILKRL-YHSKNDG--IRVRALVGLCKLG
      . : : : : : : : . . . . : : : : . . . . : : : : . . . . : : : :
TgUNC  HRRQQEAALEVLLACMDFPELRATLLEANAVPVFAKVCSESANVGCWMMRARLAAALARL-
      600      610      620      630      640      650

500      510      520      530
DmUNC  SYGGQDAAIRPF-----GDG--AALKLAEACRRFLIKP-GKDKDI
      : . . . : : : : : : : : : : : : : : : : : : : : : : : :
TgUNC  SVHDEDVRIQVFDSDIDFYDVLVDVLVSEIRAAGGDGRQVAEPSTEAKNAQKQOPMAVGEET
      660      670      680      690      700      710

540      550      560      570      580
DmUNC  RRWAADGLAYLTLDAECKEKLIEDKAS---IHALMDLARGGNQSCLYGVVTTFFV---NLC
      : . . . : : : : : : : : : : : : : : : : : : : : : : : :
TgUNC  FRFLLEIFFFLSLHGDFKARLVTGKKGARVLRLLQVANGAGKKGASSSLTRYLLQLSLC
      720      730      740      750      760      770

590      600      610      620
DmUNC  NAY----EKQ-----EMLPEMIELAKF----AKQHIPPEHELDVDF
      : . . . : : : : : : : : : : : : : : : : : : : : : : : :
TgUNC  NIMRSREDRQRORRRKGEVGSPLADVDEQLQLEELFKKLPEGAKPAANGEVDLGDKAL
      780      790      800      810      820      830

630      640      650      660      670
DmUNC  INKRITVLANEGITTAL----CALAKTESHNSQELIARVNLNAVCGLKELRGKVVQEGGVK
      . . . : . . . : : : : : : : : : : : : : : : : : : : : : : : :
TgUNC  ATQLRDMLLDLNVVHAIAVNVCA-TPPSSNVLCAAAQALKFLCEDSRHRGRAVQEGGIR
      840      850      860      870      880      890

680      690      700      710      720      730
DmUNC  ALLRMA--LEGTEKGRHATQALARIGITINPEVSFSGQRSLDVIRPLLNLLQQDCTALE
      . : : : : : : : . : : : : : : : . : : : : : : : . : : : : : : :
TgUNC  TLLVAASGLEEFPPDDQRNARQAAAQLCITTPAL-FSYRESLDLV-PCLAPLLKDRHELL
      900      910      920      930      940      950

740      750      760      770      780      790
DmUNC  NFESLMALTNLASMNESVRQRIIKEQGVSKIIEYYLMEDHLYLTRAQA-QLCNLVMSDEV
      . . . . : : : : : : : : : : : : : : : : : : : : : : : : : : : :
TgUNC  QYEGALALTNLCALSEEVRMRAWL-GGVWEGFEDLMFGENELLRAAGLEGWCNLSASPTV
      960      970      980      990      1000      1010

800      810      820      830      840
DmUNC  -----IKMFEGNDRVK----FLALLCEDEDEETATACAGALAII-TSVSVKCCEKIL
      . . : : : : : : : : : : : : : : : : : : : : : : : : : : : :
TgUNC  QAEIGKKMERFAAEKQEVQDVKLLLAFTRETNNPRAQSAAVAALAMLLANEKVARCLPAY
      1020      1030      1040      1050      1060      1070

```

```

      850      860      870      880      890
DmUNC  AIASWLDILLHTLIANPSPAVQHRGIVIILNMI-----NAGEEIAKKLFETDIMELLSGL
      . . . : . . . : . . . : . . . : . . . : . . . : . . . : . . . :
TgUNC  SLFGNLALSLEEAKAEQEALIVRCVSALYNVWIELSSSEAGTETRMQIVKT----LQRNQ
      1080      1090      1100      1110      1120

      900      910      920      930      940
DmUNC  GQLPDDTRAKAREVATQCLAAAERYRIIERSDNAEIPDVFAENSKISEIIDD
      . : . . . : . . . : . . . : . . . : . . . : . . . : . . . :
TgUNC  QKLTGDAQHLAKEVLTAELSQTNTHT-----KESTPD-----SS
      1130      1140      1150      1160

```

Sequence alignment of *Drosophila melanogaster* UNC-45 (DmUNC) (accession number AAK93568) with TgUNC (accession number XM\_002367241.1), using the program ALIGN (<http://xylian.igh.cnrs.fr/bin/align-guess.cgi>)(1), shows 22.5% identity. L161 (bold red font) marks the start of the central domain, and E682 (bold red font) the start of the UCS domain. The crystal structure of DmUNC has been determined (PDB ID: 3NOW)(2). Amino acid positions that conform to the ARM repeat consensus sequence and structural requirements proposed by Andrade et al. (3) were previously identified by Lee et al. (2), and are highlighted in yellow. 40.4% of these ARM consensus residues (63 of 156) are identical in TgUNC (highlighted in yellow). The last five ARM motifs (17-21, motif 17 starts around Arg715) are the proposed sites of interaction with myosin (2).

1. Pearson WR, Wood T, Zhang Z, Miller W (1997) Comparison of DNA sequences with protein sequences. *Genomics* 46(1):24-36.
2. Lee CF, et al. (2011) X-ray crystal structure of the UCS domain-containing UNC-45 myosin chaperone from *Drosophila melanogaster*. *Structure* 19(3):397-408.
3. Andrade MA, Petosa C, O'Donoghue SI, Muller CW, Bork P (2001) Comparison of ARM and HEAT protein repeats. *J. Mol. Biol.* 309(1):1-18.
